# Supplementary material for: Racial differences as predictors of outcomes in young patients with multiple myeloma
Source: PubMed Central journal article supplement (PMC9329432; doi:10.1038/s41408-022-00708-3), 2022-07-27
Supplement: 41408_2022_708_MOESM1_ESM.pdf [file 41408_2022_708_MOESM1_ESM.pdf]

# **Supplemental materials of Racial differences as predictors of outcomes in young patients with multiple myeloma**

**Authors:** Alicia Bao<sup>1</sup>, Qihong Zhao<sup>2</sup>, Elizabeth Merritt<sup>3</sup>, Naresh Bumma<sup>2</sup>, Srinivas Devarakonda<sup>2</sup>, Abdullah M. Khan<sup>2</sup>, Elvira Umyarova<sup>2</sup>, Ashley E. Rosko<sup>2</sup>, Don M. Benson<sup>2</sup>, and Francesca Cottini<sup>2\*</sup>

## **Affiliations:**

<sup>1</sup> College of Medicine, The Ohio State University, Columbus, OH

<sup>2</sup> Department of Internal Medicine, Division of Hematology, College of Medicine, The Ohio State University, Columbus, OH

<sup>3</sup> The Ohio State University, Columbus, OH

## **To whom correspondence should be addressed\*:**

Francesca Cottini, MD

Assistant Professor of Medicine

Division of Hematology

The Ohio State University

College of Medicine

400 West 12<sup>th</sup> Avenue

Columbus OH 43210-1240 USA

Email: [francesca.cottini@osumc.edu](mailto:francesca.cottini@osumc.edu)

phone: 614-292-6818

**Supplemental Material Content:**

**Supplementary Table S1.** Patient, disease, and treatment characteristics (n = 258).

**Supplementary Table S2.** Type and time of occurrence of second malignancy in non-Hispanic White and non-Hispanic Black patients with Multiple Myeloma (MM).

**Supplementary Table S3.** Progression-free survival (PFS) rates with 95% Confidence Intervals (CI) in non-Hispanic White and non-Hispanic Black patients at 1, 3, 5, and 10 years.

**Supplementary Table S4.** Overall survival (OS) rates with 95% Confidence Intervals (CI) in non-Hispanic White and non-Hispanic Black patients at 1, 3, 5, 10, 15, and 20 years.

**Supplementary Figure S1.** Outcomes of non-Hispanic White patients (NHWP) and non-Hispanic Black patients (NHBP) with MM diagnosed before age 50, stratified based on induction regimen.

**Supplementary Figure S2.** Overall survival (OS) outcomes of non-Hispanic White patients (NHWP) and non-Hispanic Black patients (NHBP) with MM diagnosed before age 50 without a second malignancy.

**Supplementary Figure S3.** Overall survival (OS) outcomes of non-Hispanic White patients (NHWP) and non-Hispanic Black patients (NHBP) with MM diagnosed before age 50, stratified based on the presence of del(13q).

**Supplementary Table S1. Patient, disease, and treatment characteristics (n = 258).**

|                                          | All (n = 258)    | Non-Hispanic White patients<br>(n = 198) | Non-Hispanic Black patients<br>(n = 60) | <i>P</i> -value |
|------------------------------------------|------------------|------------------------------------------|-----------------------------------------|-----------------|
| <b>Age (median, range)</b>               | 46 (17-50)       | 46 (17-50)                               | 45 (34-50)                              | 0.32            |
| < 30 years (no-%)                        | 6 (2.3)          | 6 (3.0)                                  | 0 (0)                                   |                 |
| 30-40 years (no-%)                       | 35 (13.6)        | 23 (11.6)                                | 12 (20)                                 |                 |
| 40-50 years (no-%)                       | 217 (84.1)       | 169 (85.4)                               | 48 (80)                                 |                 |
| <b>Gender (no-%)</b>                     |                  |                                          |                                         | 0.18            |
| Male                                     | 165 (64.0)       | 131 (66.2)                               | 34 (56.7)                               |                 |
| Female                                   | 93 (36.0)        | 67 (33.8)                                | 26 (43.3)                               |                 |
| <b>Year of diagnosis (no-%)</b>          |                  |                                          |                                         | 0.08            |
| 1992-2002                                | 25 (9.6)         | 23 (11.6)                                | 2 (3.3)                                 |                 |
| 2003-2019                                | 233 (90.4)       | 175 (88.4)                               | 58 (96.7)                               |                 |
| <b>ISS stage (no-%)</b>                  |                  |                                          |                                         | 0.11            |
| Stage I                                  | 89 (42.0)        | 66 (40.0)                                | 23 (48.9)                               |                 |
| Stage II                                 | 66 (31.1)        | 49 (29.7)                                | 17 (36.2)                               |                 |
| Stage III                                | 57 (26.9)        | 50 (30.3)                                | 7 (14.9)                                |                 |
| NA                                       | 46               | 33                                       | 13                                      |                 |
| <b>MM type (no-%)</b>                    |                  |                                          |                                         | 0.37            |
| IgG                                      | 121 (46.9)       | 89 (44.9)                                | 32 (53.3)                               |                 |
| IgA                                      | 53 (20.5)        | 44 (22.2)                                | 9 (15.0)                                |                 |
| Light chain disease                      | 72 (27.9)        | 56 (28.3)                                | 16 (26.7)                               |                 |
| Other                                    | 12 (4.7)         | 9 (4.5)                                  | 3 (5.0)                                 |                 |
| <b>Presentation (no-%)</b>               |                  |                                          |                                         | 0.56            |
| MM                                       | 201 (77.9)       | 151 (76.3)                               | 50 (83.3)                               |                 |
| EMD-Bone                                 | 28 (10.9)        | 22 (11.1)                                | 6 (10)                                  |                 |
| EMD                                      | 21 (8.1)         | 17 (8.6)                                 | 4 (6.7)                                 |                 |
| PCL                                      | 6 (2.3)          | 6 (3.0)                                  | 0 (0.0)                                 |                 |
| Amyloidosis                              | 2 (0.8)          | 2 (1.0)                                  | 0 (0.0)                                 |                 |
| <b>Cytogenetics (no-%)</b>               | <b>(n = 210)</b> | <b>(n = 159)</b>                         | <b>(n = 51)</b>                         |                 |
| t(11;14)                                 | 42 (20)          | 28 (17.6)                                | 14 (27.5)                               | 0.13            |
| t(4;14)                                  | 15 (7.1)         | 13 (8.2)                                 | 2 (3.9)                                 | 0.30            |
| t(8;14)                                  | 4 (1.9)          | 4 (2.5)                                  | 0 (0.0)                                 | 0.25            |
| Del(17p)                                 | 15 (7.1)         | 13 (8.2)                                 | 2 (3.9)                                 | 0.30            |
| Del(13q)                                 | 72 (34.3)        | 62 (39.0)                                | 10 (19.6)                               | 0.01            |
| 1q21+                                    | 48 (22.9)        | 37 (23.3)                                | 11 (21.6)                               | 0.80            |
| Hypodiploidy                             | 5 (2.4)          | 2 (1.3)                                  | 3 (5.9)                                 | 0.09            |
| <b>Risk category (no-%)</b>              |                  |                                          |                                         | 0.37            |
| Standard (0 HRCA)                        | 147 (70.0)       | 111 (68.9)                               | 36 (73.5)                               |                 |
| High-risk (1 HRCA)                       | 49 (23.3)        | 37 (23.0)                                | 12 (24.5)                               |                 |
| Ultra-high risk (≥ 2 HRCA)               | 14 (6.7)         | 13 (8.1)                                 | 1 (2.0)                                 |                 |
| <b>Induction therapy (no-%)</b>          |                  |                                          |                                         | 0.94            |
| Bortezomib-dex (VD)                      | 57 (22.1)        | 44 (22.2)                                | 13 (21.7)                               |                 |
| Lenalidomide-dex (RD)                    | 25 (9.7)         | 19 (9.6)                                 | 6 (10.0)                                |                 |
| Bortezomib-lenalidomide-dex (VRD)        | 70 (27.1)        | 52 (26.3)                                | 18 (30.0)                               |                 |
| Other                                    | 106 (41.1)       | 83 (41.9)                                | 23 (38.3)                               |                 |
| <b>Transplant (no-%)</b>                 |                  |                                          |                                         | 0.11            |
| No                                       | 20 (7.8)         | 13 (6.6)                                 | 7 (11.7)                                |                 |
| One ASCT                                 | 195 (75.6)       | 149 (75.3)                               | 46 (76.7)                               |                 |
| Two or more ASCT                         | 30 (11.6)        | 23 (11.3)                                | 7 (11.7)                                |                 |
| ASCT followed by Allogeneic              | 13 (5.0)         | 13 (6.6)                                 |                                         |                 |
| <b>Maintenance after ASCT (no-%)</b>     | <b>(n = 238)</b> | <b>(n = 185)</b>                         | <b>(n = 53)</b>                         | 0.31            |
| No                                       | 120 (50.4)       | 90 (48.6)                                | 24 (56.6)                               |                 |
| Yes                                      | 118 (49.6)       | 95 (51.4)                                | 21 (43.4)                               |                 |
| <b>Lines of therapy (median, range)</b>  | 3 (1-21)         | 3 (1-15)                                 | 3 (1-21)                                | 0.82            |
| <b>Family History of cancer (no-%)</b>   | <b>(n = 221)</b> | <b>(n = 172)</b>                         | <b>(n = 49)</b>                         |                 |
| Negative                                 | 99 (44.8)        | 71 (41.3)                                | 28 (57.1)                               | 0.05            |
| Positive other than MM                   | 115 (52.0)       | 95 (55.2)                                | 20 (40.8)                               | 0.10            |
| Positive for MM/MGUS                     | 7 (0.03)         | 6 (3.4)                                  | 1 (2.0)                                 | 0.99            |
| <b>Personal history of cancer (no-%)</b> | <b>(n = 226)</b> | <b>(n = 176)</b>                         | <b>(n = 50)</b>                         |                 |
| No                                       | 203 (89.8)       | 154 (87.5)                               | 49 (98.0)                               | 0.03            |
| Before MM diagnosis                      | 10 (4.4)         | 9 (5.1)                                  | 1 (2.0)                                 | 0.70            |
| After MM diagnosis                       | 13 (5.8)         | 13 (7.4)                                 | 0 (0.0)                                 | 0.08            |
| <b>Smoking (no-%)</b>                    | <b>(n = 251)</b> | <b>(n = 193)</b>                         | <b>(n = 58)</b>                         | 0.37            |

|                                       |            |            |           |  |
|---------------------------------------|------------|------------|-----------|--|
| No                                    | 144 (57.3) | 114 (59.1) | 30 (51.8) |  |
| Yes (Active or previous at diagnosis) | 107 (42.7) | 79 (40.9)  | 28 (48.2) |  |

Abbreviations: ISS- International staging system, MM- multiple myeloma, EMD- extramedullary disease, PCL- plasma cell leukemia, HRCA- high-risk chromosomal abnormalities, dex- dexamethasone, ASCT- autologous stem cell transplant, MGUS- monoclonal gammopathy of undetermined significance.

**Supplementary Table S2. Type and time of occurrence of second malignancy in non-Hispanic White and non-Hispanic Black patients with Multiple Myeloma (MM).**

| Second malignancy                 | n = 226  | Non-Hispanic White patients<br>(n = 176)                                                                                                                                                                                                                                 | Non-Hispanic Black patients<br>(n = 50) | <i>P-value</i> |
|-----------------------------------|----------|--------------------------------------------------------------------------------------------------------------------------------------------------------------------------------------------------------------------------------------------------------------------------|-----------------------------------------|----------------|
| <b>Before MM diagnosis (no-%)</b> | 10 (4.4) | 9 (5.1)                                                                                                                                                                                                                                                                  | 1 (2.0)                                 | 0.70           |
| <b>Second malignancy type</b>     |          | 1) Hairy cell leukemia<br>2) Melanoma<br>3) Cervical cancer<br>4) Endometrial cancer<br>5) CLL<br>6) Papillary thyroid cancer<br>7) Squamous cell carcinoma of the skin<br>8) Mantle cell lymphoma<br>9) Meningioma                                                      | 1) Cervical cancer                      |                |
| <b>After MM diagnosis (no-%)</b>  | 13 (5.8) | 13 (7.4)                                                                                                                                                                                                                                                                 | 0 (0)                                   | 0.08           |
| <b>Second malignancy type</b>     |          | 1) Renal cell carcinoma<br>2) Colorectal cancer [2]<br>3) Cutaneous T-cell lymphoma<br>4) Myelodysplastic syndrome<br>5) Basal cell carcinoma [2]<br>6) B-ALL [2]<br>7) DLBCL<br>8) Schwannoma<br>9) Papillary thyroid cancer<br>10) Squamous cell carcinoma of the skin |                                         |                |

Abbreviations: CLL, chronic lymphocytic leukemia, B-ALL, B-cell acute lymphoblastic leukemia, DLBCL, diffuse large B-cell lymphoma.

**Supplementary Table S3. Progression-free survival (PFS) rates with 95% Confidence Intervals (CI) in non-Hispanic White and non-Hispanic Black patients at 1, 3, 5, and 10 years.**

| Non-Hispanic White patients |                                |        |     | Non-Hispanic Black patients |                                |        |     |
|-----------------------------|--------------------------------|--------|-----|-----------------------------|--------------------------------|--------|-----|
| Year                        | PFS rate from diagnosis        | 95% CI |     | Year                        | PFS rate from diagnosis        | 95% CI |     |
| 1                           | 91%                            | 86%    | 95% | 1                           | 98%                            | 86%    | 95% |
| 3                           | 54%                            | 47%    | 61% | 3                           | 65%                            | 52%    | 76% |
| 5                           | 38%                            | 31%    | 45% | 5                           | 50%                            | 36%    | 62% |
| 10                          | 22%                            | 16%    | 29% | 10                          | 26%                            | 14%    | 39% |
| Median PFS                  | 3.2                            | 2.8    | 4.3 | Median PFS                  | 5.9                            | 3.0    | 6.2 |
| Year                        | PFS rate from first transplant | 95% CI |     | Year                        | PFS rate from first transplant | 95% CI |     |
| 1                           | 74%                            | 67%    | 79% | 1                           | 81%                            | 67%    | 89% |
| 3                           | 45%                            | 38%    | 52% | 3                           | 54%                            | 39%    | 67% |
| 5                           | 33%                            | 26%    | 40% | 5                           | 47%                            | 33%    | 60% |
| 10                          | 18%                            | 13%    | 25% | 10                          | 26%                            | 14%    | 40% |
| Median PFS                  | 2.4                            | 1.8    | 3.5 | Median PFS                  | 3.3                            | 2.0    | 5.8 |

**Supplementary Table S4. Overall survival (OS) rates with 95% Confidence Intervals (CI) in non-Hispanic White and non-Hispanic Black patients at 1, 3, 5, 10, 15, and 20 years.**

| Non-Hispanic White |                               |        |      | Non-Hispanic Black |                               |        |      |
|--------------------|-------------------------------|--------|------|--------------------|-------------------------------|--------|------|
| Year               | OS rate from diagnosis        | 95% CI |      | Year               | OS rate from diagnosis        | 95% CI |      |
| 1                  | 99%                           | 96%    | 100% | 1                  | 98%                           | 89%    | 100% |
| 3                  | 82%                           | 76%    | 87%  | 3                  | 91%                           | 80%    | 96%  |
| 5                  | 66%                           | 58%    | 72%  | 5                  | 86%                           | 73%    | 93%  |
| 10                 | 47%                           | 39%    | 54%  | 10                 | 54%                           | 37%    | 68%  |
| 15                 | 30%                           | 21%    | 39%  | 15                 | 54%                           | 37%    | 68%  |
| 20                 | 14%                           | 6%     | 24%  | 20                 | NR                            | NR     | NR   |
| Median OS          | 8.6                           | 6.9    | 12.1 | Median OS          | NR                            | 7.4    | NR   |
| Year               | OS rate from first transplant | 95% CI |      | Year               | OS rate from first transplant | 95% CI |      |
| 1                  | 93%                           | 88%    | 96%  | 1                  | 92%                           | 81%    | 97%  |
| 3                  | 73%                           | 66%    | 79%  | 3                  | 84%                           | 71%    | 92%  |
| 5                  | 61%                           | 53%    | 68%  | 5                  | 75%                           | 60%    | 85%  |
| 10                 | 44%                           | 36%    | 52%  | 10                 | 52%                           | 35%    | 66%  |
| 15                 | 26%                           | 17%    | 36%  | 15                 | 52%                           | 35%    | 66%  |
| 20                 | 9%                            | 2%     | 21%  | 20                 | NR                            | NR     | NR   |
| Median OS          | 7.3                           | 5.5    | 11.4 | Median OS          | NR                            | 6.1    | NR   |

Abbreviations: NR, not reached

**Figure S1.**

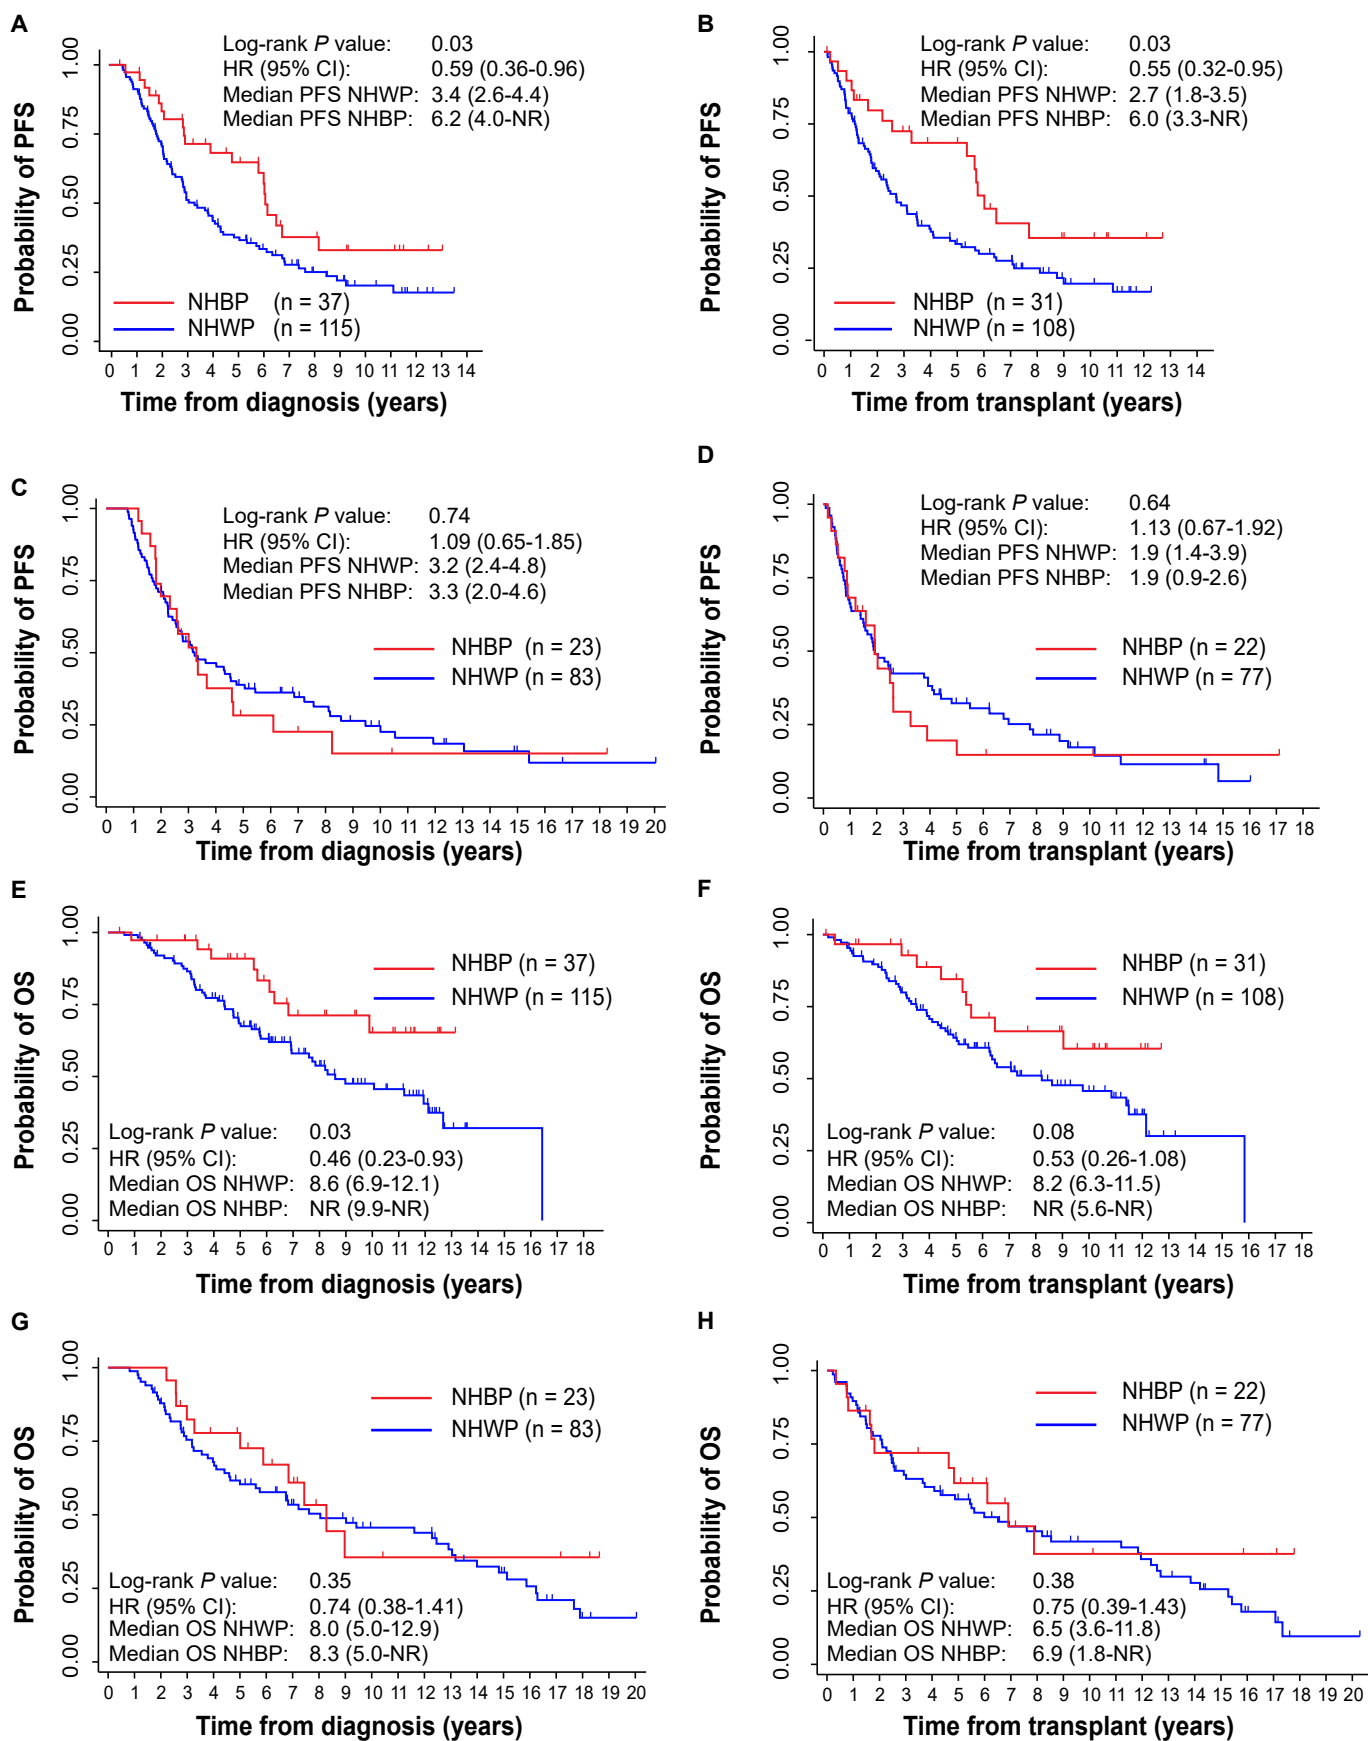

**Figure S1. Outcomes of non-Hispanic White patients (NHWP) and non-Hispanic Black patients (NHBP) with MM diagnosed before age 50, stratified based on induction regimen.**

Kaplan-Meier curves of progression-free survival (PFS) from diagnosis or first transplant in NHWP and NHBP who received VD-RD-VRD (A-B) or other therapies (C-D) as induction strategy; Kaplan-Meier curves of overall survival (OS) from diagnosis or first transplant in NHWP and NHBP who received VD-RD-VRD (E-F) or other therapies (G-H) as induction strategy. V, bortezomib; R, lenalidomide; D, dexamethasone; *P*, log-rank p-value; HR, Hazard Ratio; CI, Confidence Interval; NR, not reached.

**Figure S2.**

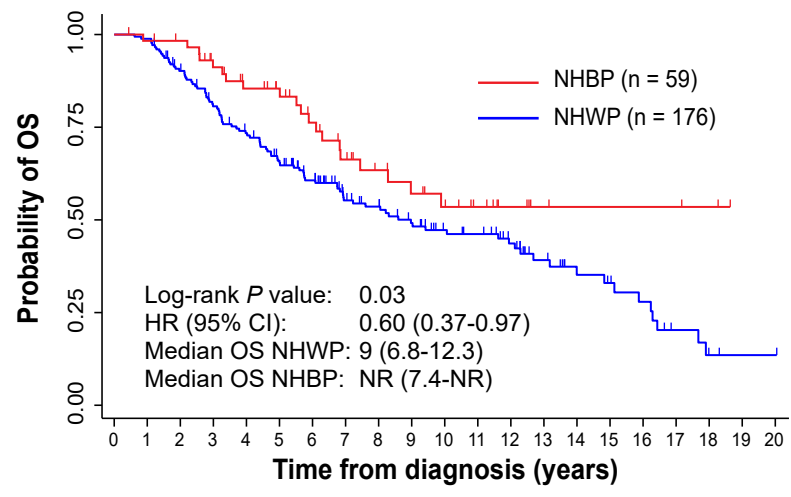

**Figure S2. Overall survival (OS) outcomes of non-Hispanic White patients (NHWP) and non-Hispanic Black patients (NHBP) with MM diagnosed before age 50 without a second malignancy.** Kaplan-Meier curves of OS from diagnosis in n = 235 patients. *P*, log-rank p-value; HR, Hazard Ratio; CI, Confidence Interval; NR, not reached.

**Figure S3.**

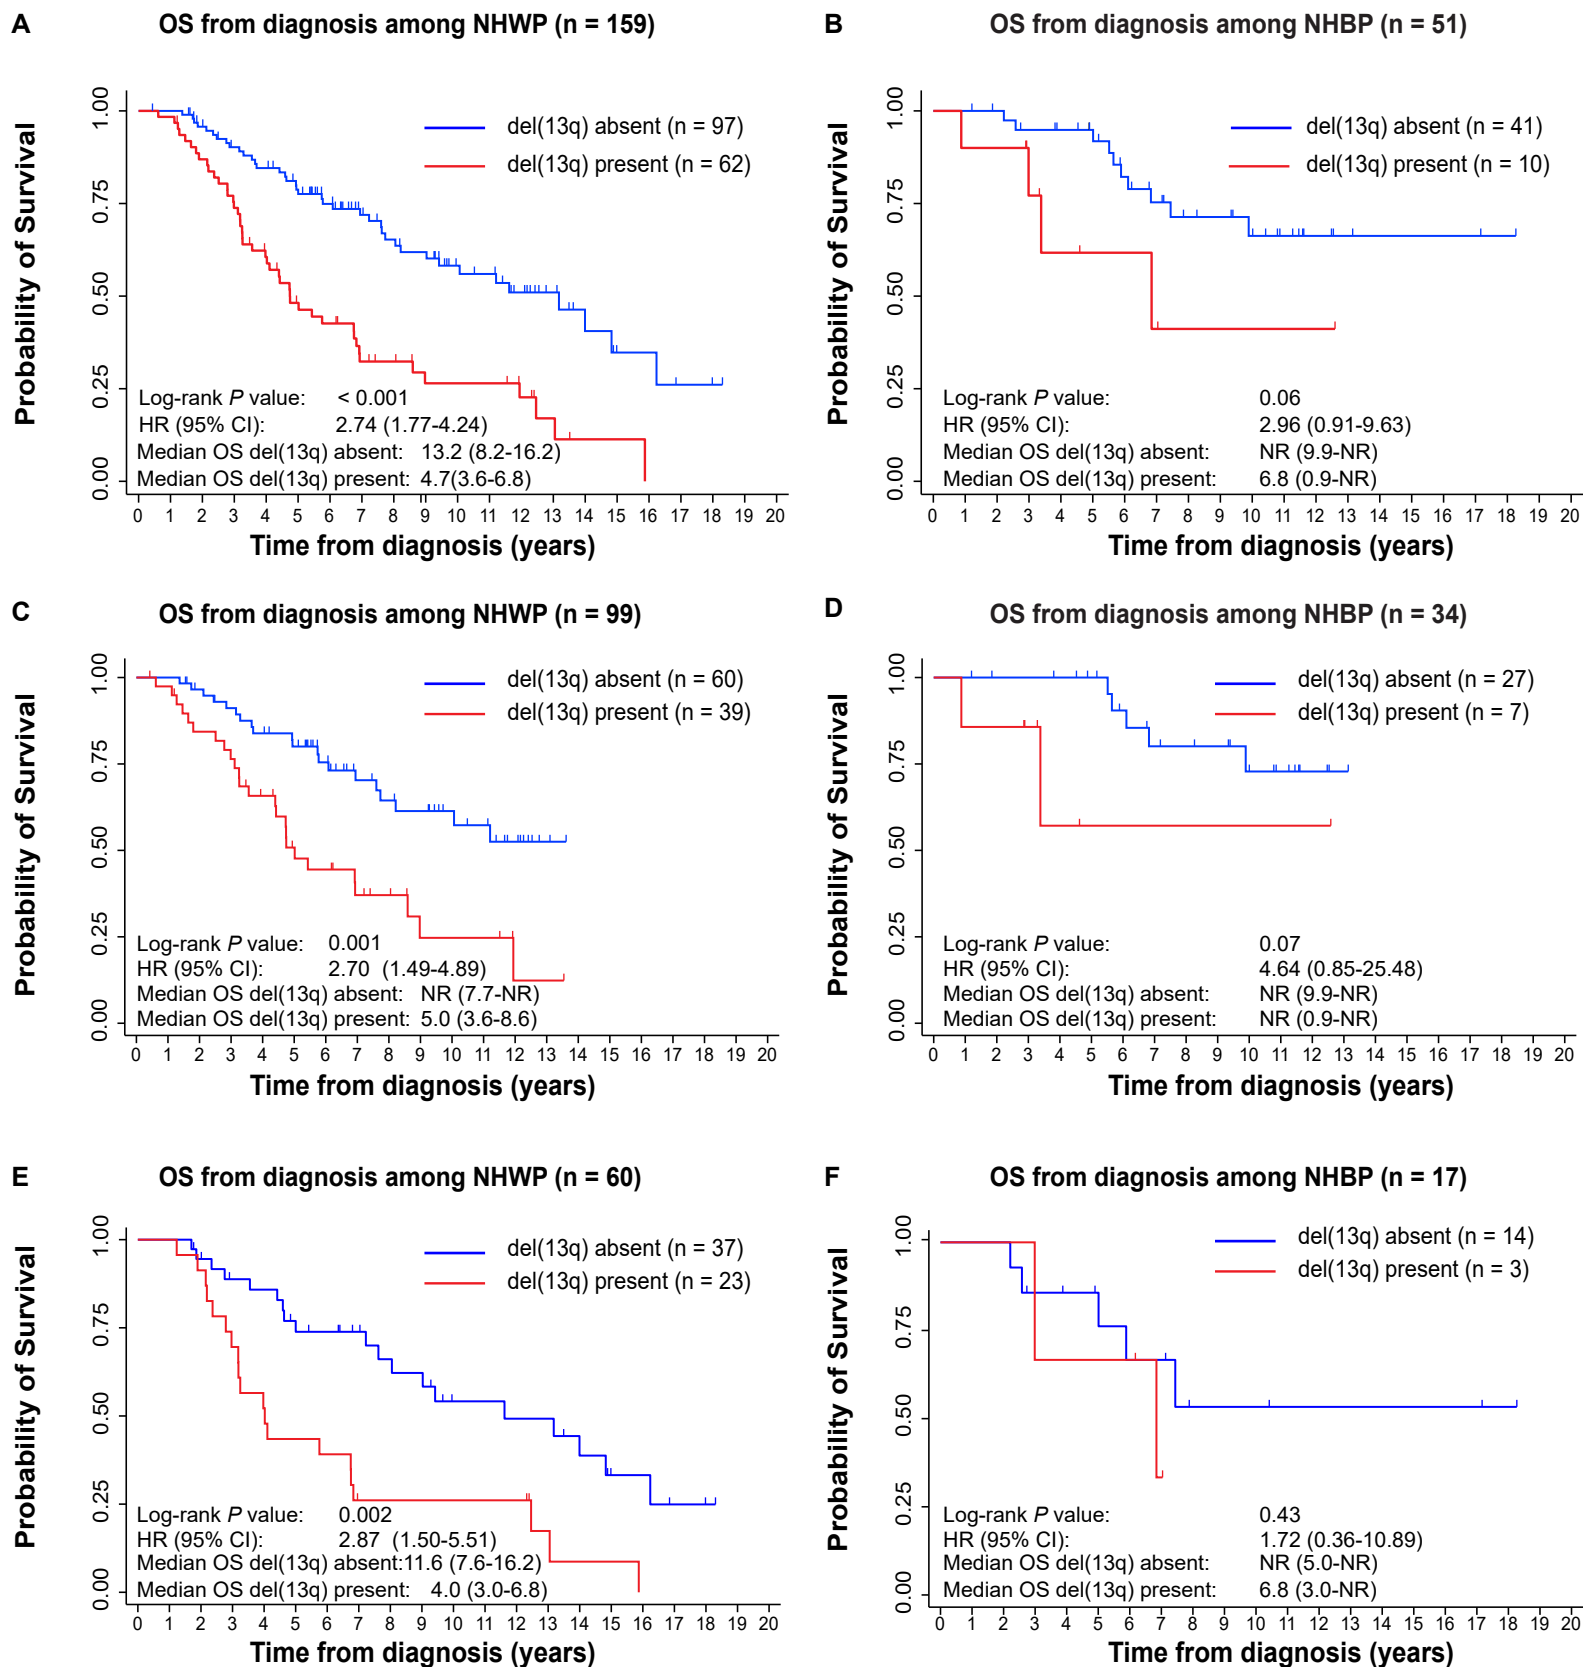

**Figure S3. Overall survival (OS) outcomes of non-Hispanic White patients (NHWP) and non-Hispanic Black patients (NHBP) with MM diagnosed before age 50, stratified based on the presence of del(13q).** Kaplan-Meier curves of OS from diagnosis based on the presence or absence of del(13q) in all NHWP (A) or NHBP (B), in NHWP (C) or NHBP (D) treated with VD-RD-VRD, and in NHWP (E) or NHBP (F) treated with other induction therapies. *P*, log-rank p-value; HR, Hazard Ratio; CI, Confidence Interval; NR, not reached.
